# Supplementary material
Source: publisher figshare collection journal article supplement (https://acs.figshare.com/ndownloader/files/4552123)
Supplement: Supplementary file 1 [file 4552123]

data_trans
_audit_creation_date              2008-09-09
_audit_creation_method            'Materials Studio'
_symmetry_space_group_name_H-M    'P1'
_symmetry_Int_Tables_number       1
_symmetry_cell_setting            triclinic
loop_
_symmetry_equiv_pos_as_xyz
  x,y,z
_cell_length_a                    13.0000
_cell_length_b                    9.8474
_cell_length_c                    13.5000
_cell_angle_alpha                 108.0009
_cell_angle_beta                  105.7037
_cell_angle_gamma                 88.0800
loop_
_atom_site_label
_atom_site_type_symbol
_atom_site_fract_x
_atom_site_fract_y
_atom_site_fract_z
_atom_site_U_iso_or_equiv
_atom_site_adp_type
_atom_site_occupancy
C0     C     0.32887   0.44552   0.02215   0.00000  Uiso   1.00
C1     C     0.33979   0.31361   0.04491   0.00000  Uiso   1.00
C2     C     0.39654   0.56302   0.08471   0.00000  Uiso   1.00
C3     C     0.38579   0.69480   0.06179   0.00000  Uiso   1.00
C4     C     0.48735   0.56061   0.18131   0.00000  Uiso   1.00
C5     C     0.34170   0.19427   0.05591   0.00000  Uiso   1.00
C6     C     0.23792   0.44787   0.92564   0.00000  Uiso   1.00
C7     C     0.33721   0.06208   0.07646   0.00000  Uiso   1.00
C8     C     0.27074   0.05754   0.15150   0.00000  Uiso   1.00
C9     C     0.38429   0.81396   0.05050   0.00000  Uiso   1.00
C10    C     0.38891   0.94602   0.02979   0.00000  Uiso   1.00
C11    C     0.45470   0.95014   0.95408   0.00000  Uiso   1.00
H0     H     0.45460   0.05581   0.94279   0.00000  Uiso   1.00
H1     H     0.18650   0.07502   0.11611   0.00000  Uiso   1.00
H2     H     0.49017   0.45502   0.19306   0.00000  Uiso   1.00
H3     H     0.47827   0.64153   0.25526   0.00000  Uiso   1.00
H4     H     0.56438   0.58694   0.17048   0.00000  Uiso   1.00
H5     H     0.27491   0.95409   0.16683   0.00000  Uiso   1.00
H6     H     0.29830   0.14337   0.22912   0.00000  Uiso   1.00
H7     H     0.53784   0.92504   0.98609   0.00000  Uiso   1.00
H8     H     0.16081   0.42378   0.93739   0.00000  Uiso   1.00
H9     H     0.24595   0.36538   0.85197   0.00000  Uiso   1.00
H10    H     0.42299   0.86899   0.87465   0.00000  Uiso   1.00
H11    H     0.23599   0.55277   0.91209   0.00000  Uiso   1.00
loop_
_geom_bond_atom_site_label_1
_geom_bond_atom_site_label_2
_geom_bond_distance
_geom_bond_site_symmetry_2
C0     C1      1.419   .    
C0     C2      1.374   .    
C0     C6      1.510   1_554
C1     C5      1.228   .    
C2     C3      1.418   .    
C2     C4      1.510   .    
C3     C9      1.228   .    
C4     H2      1.097   .    
C4     H3      1.101   .    
C4     H4      1.101   .    
C5     C7      1.418   .    
C6     C0      1.510   1_556
C6     H8      1.101   .    
C6     H9      1.100   .    
C6     H11     1.102   .    
C7     C8      1.510   .    
C7     C10     1.374   1_545
C8     H1      1.101   .    
C8     H5      1.097   1_545
C8     H6      1.100   .    
C9     C10     1.418   .    
C10    C7      1.374   1_565
C10    C11     1.510   1_554
C11    C10     1.510   1_556
C11    H0      1.097   1_565
C11    H7      1.101   .    
C11    H10     1.101   .    
H0     C11     1.097   1_545
H5     C8      1.097   1_565
